# Supplementary material for: Are anti-ganglioside antibodies associated with proventricular dilatation disease in birds?
Source: PeerJ. 2017 Apr 11;5:e3144. doi: 10.7717/peerj.3144 (PMC5390765; doi:10.7717/peerj.3144)
Supplement: Data S1 [file peerj-05-3144-s001.xlsx]

## Sheet: Sheet1
User: USER
Path: C:\Program Files\BMG\Omega\User\Data\
Test ID: 2026
Test Name: ELISA TIZARD 1dpi
Date: 11/7/2014
Time: 1:26:06 PM
ID1: Leal gangliosides
ID2: w2-2 pooled 1:50
ID3: XVI
Absorbance			Absorbance values are displayed as OD
	Raw Data (405)
	QP1(crude)	QP1 (purified)	QP2 (crude)	QP2 (purified)	QP3 (crude)	QP3 (Purified)	QP4 (crude)	QP4 (purified)	QP5 (crude)	QP5 (purified)	H macaw	H macaw
A	0.073	0.069	0.08	0.082	0.081	0.08	0.101	0.103	0.083625	0.07	0.07	0.07	Sample
B	0.074	0.069	0.078	0.081	0.078	0.08	0.111	0.09	0.067	0.08	0.069	0.06	Sample
C	0.071	0.071	0.082	0.081	0.077	0.082	0.109	0.096	0.069	0.074	0.071	0.06	Sample
D	0.05	0.052	0.051	0.04	0.051	0.049	0.051	0.052	0.056	0.035	0.049	0.052	Negative
E	0.049	0.051	0.053	0.051	0.05	0.042	0.05	0.075	0.048	0.051	0.052	0.057	Negative
F	0.047	0.05	0.048	0.054	0.05	0.041	0.08	0.049	0.053	0.049	0.051	0.049	Negative
G	0.049	0.048	0.054	0.051	0.05	0.051	0.048	0.045	0.058	0.053	0.049	0.046	Negative
H	0.05	0.056	0.047	0.048	0.046	0.049	0.052	0.057	0.05	0.049	0.036	0.047	Negative

## Sheet: Sheet2
User: USER
Path: C:\Program Files\BMG\Omega\User\Data\
Test ID: 2026
Test Name: ELISA TIZARD 25 dpi
Date: 11/7/2014
Time: 1:26:06 PM
ID1: Leal gangliosides
ID2: w2-2 pooled 1:50
ID3: XVI
Absorbance			Absorbance values are displayed as OD
	Raw Data (405)
	QP1(crude)	QP1 (purified)	QP2 (crude)	QP2 (purified)	QP3 (crude)	QP3 (Purified)	QP4 (crude)	QP4 (purified)	QP5 (crude)	QP5 (purified)	H macaw(crude)	H macaw(purified)
A	0.083	0.081	0.15	0.201	0.13	0.151	0.201	0.154	0.163	0.151	0.07	0.071	Sample
B	0.079	0.084	0.152	0.201	0.129	0.152	0.203	0.153	0.159	0.149	0.069	0.071	Sample
C	0.077	0.079	0.151	0.203	0.127	0.152	0.199	0.153	0.162	0.151	0.061	0.069	Sample
D	0.05	0.052	0.051	0.04	0.051	0.049	0.051	0.052	0.056	0.035	0.049	0.052	Negative
E	0.05	0.051	0.053	0.051	0.05	0.042	0.05	0.075	0.048	0.051	0.052	0.057	Negative
F	0.07	0.05	0.048	0.054	0.05	0.041	0.08	0.049	0.053	0.049	0.051	0.049	Negative
G	0.05	0.048	0.054	0.051	0.05	0.051	0.048	0.045	0.058	0.053	0.049	0.046	Negative
H	0.049	0.056	0.047	0.048	0.046	0.049	0.052	0.057	0.05	0.049	0.036	0.047	Negative

## Sheet: Sheet3
User: USER
Path: C:\Program Files\BMG\Omega\User\Data\
Test ID: 2026
Test Name: ELISA TIZARD 48dpi
Date: 11/7/2014
Time: 1:26:06 PM
ID1: Leal gangliosides
ID2: w2-2 pooled 1:50
ID3: XVI
Absorbance			Absorbance values are displayed as OD
	Raw Data (405)
	QP1(crude)	QP1 (purified)	QP2 (crude)	QP2 (purified)	QP3 (crude)	QP3 (Purified)	QP4 (crude)	QP4 (purified)	QP5 (crude)	QP5 (purified)	H macaw(crude)	H macaw(purified)
A	0.084	0.081	0.153	0.201	0.128	0.151	0.219	0.154	0.164	0.151	0.07	0.071	Sample
B	0.077	0.084	0.152	0.201	0.131	0.152	0.218	0.153	0.158	0.149	0.067	0.071	Sample
C	0.077	0.079	0.153	0.203	0.129	0.152	0.217	0.153	0.162	0.151	0.068	0.071	Sample
D	0.05	0.052	0.051	0.04	0.051	0.049	0.051	0.052	0.056	0.035	0.049	0.052	Negative
E	0.05	0.051	0.053	0.051	0.05	0.042	0.05	0.075	0.048	0.051	0.052	0.057	Negative
F	0.07	0.05	0.048	0.054	0.05	0.041	0.08	0.049	0.053	0.049	0.051	0.049	Negative
G	0.05	0.048	0.054	0.051	0.05	0.051	0.048	0.045	0.058	0.053	0.049	0.046	Negative
H	0.049	0.056	0.047	0.048	0.046	0.049	0.052	0.057	0.05	0.049	0.036	0.047	Negative
